# Supplementary material
Source: PubMed Central journal article supplement (PMC7755708)
Supplement: NIHMS1605336-supplement-1.pdf [file NIHMS1605336-supplement-1.pdf]

**Supplemental Figure 1: Propensity Score**

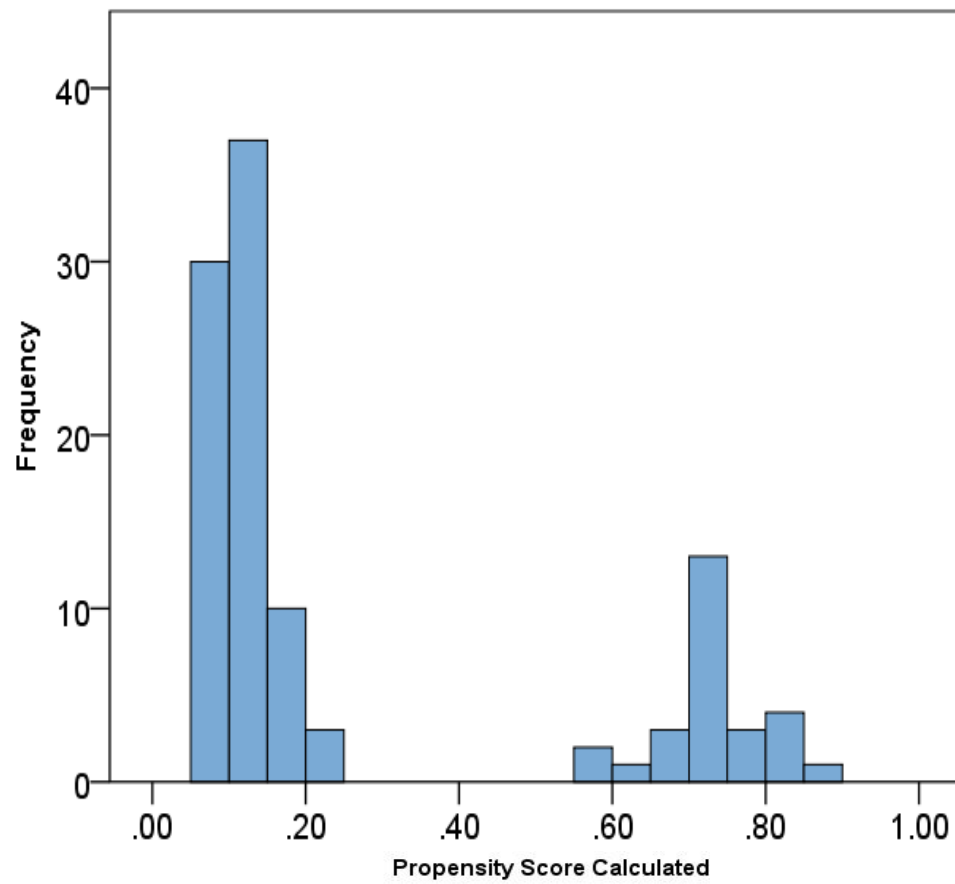

Propensity score composed of gestational age, sex, birthweight z-score, length of ventilation, and confirmed sepsis. Given the distribution of the scalar propensity score, it was dichotomized at or below 0.25.

**Supplemental Figure 2: Strobe diagram of patient recruitment**

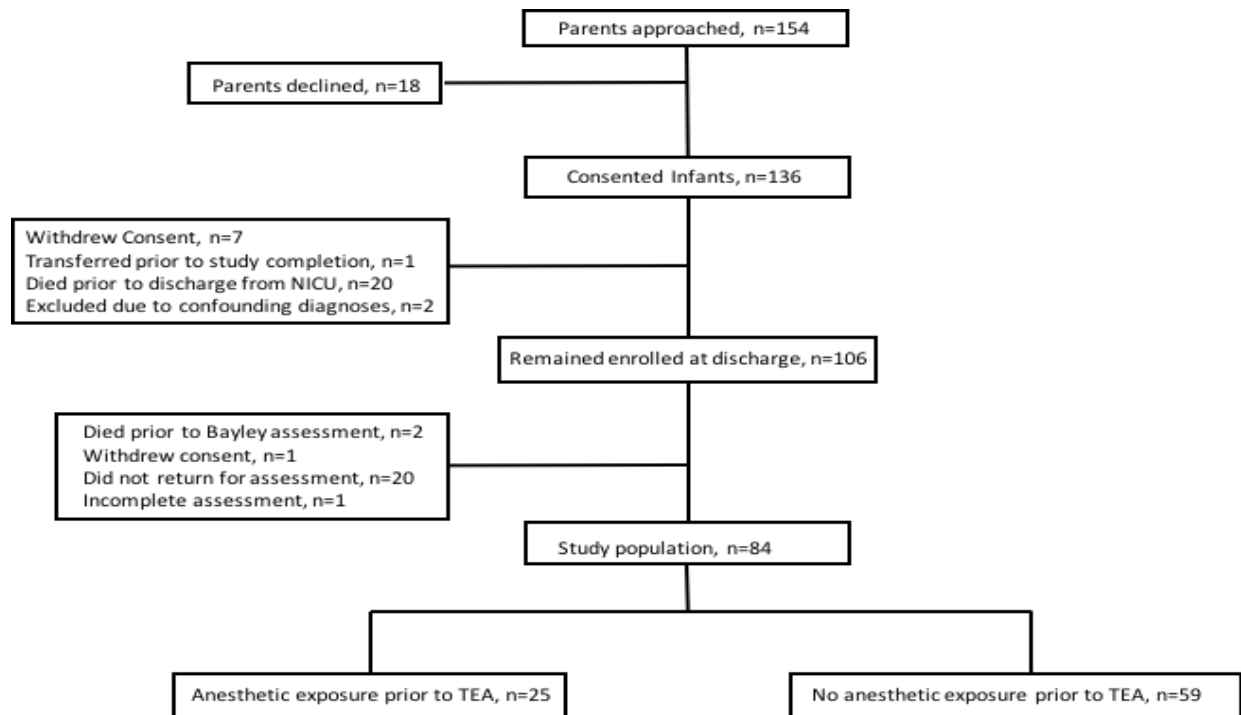

**Supplemental Table 1: Details of Infants lost to Follow-up**

|                       | Completed Follow Up (n=84) | Lost to Follow-up (n=17) | <i>p</i>         |
|-----------------------|----------------------------|--------------------------|------------------|
| Gestational Age (wks) | 27 (25-28)                 | 27 (26-28)               | .99              |
| Birthweight (g)       | 942 ± 270                  | 957 ± 149                | .75              |
| z-score               | -0.49 ± 0.99               | -0.22 ± 0.84             | .24              |
| Male                  | 38 (46)                    | 5 (29)                   | .28              |
| Maternal Age at birth | 28 (23-33)                 | 24 (20-32)               | .16              |
| Singleton             | 50 (59)                    | 17 (100)                 | <b>.002</b>      |
| Pre-natal steroids    | 76 (93)                    | 12 (71)                  | <b>&lt;0.001</b> |
| Race                  |                            |                          | .16              |
| African-American      | 32 (39)                    | 11 (65)                  |                  |
| Caucasian             | 44 (54)                    | 5 (29)                   |                  |
| Asian                 | 4 (5)                      | 0                        |                  |
| Biracial              | 2 (2)                      | 1 (6)                    |                  |
| On Oxygen at 36 wk    | 43 (52)                    | 6 (35)                   | .28              |
| Post-natal Steroids   | 9 (11)                     | 3 (18)                   | .43              |
| PDA                   | 33 (40)                    | 7 (41)                   | .94              |
| NEC                   | 5 (6)                      | 2 (12)                   | .34              |
| Confirmed Sepsis      | 27 (33)                    | 3 (18)                   | .26              |
| Anesthesia received   | 25 (31)                    | 2 (12)                   | .14              |
